# Supplementary material for: VPS13A is closely associated with mitochondria and is required for efficient lysosomal degradation
Source: PubMed Central journal article supplement (PMC6398486; doi:10.1242/dmm.036681), 2019-02-22
Supplement: dmm-12-036681-s1.pdf [file dmm-12-036681-s1.pdf]

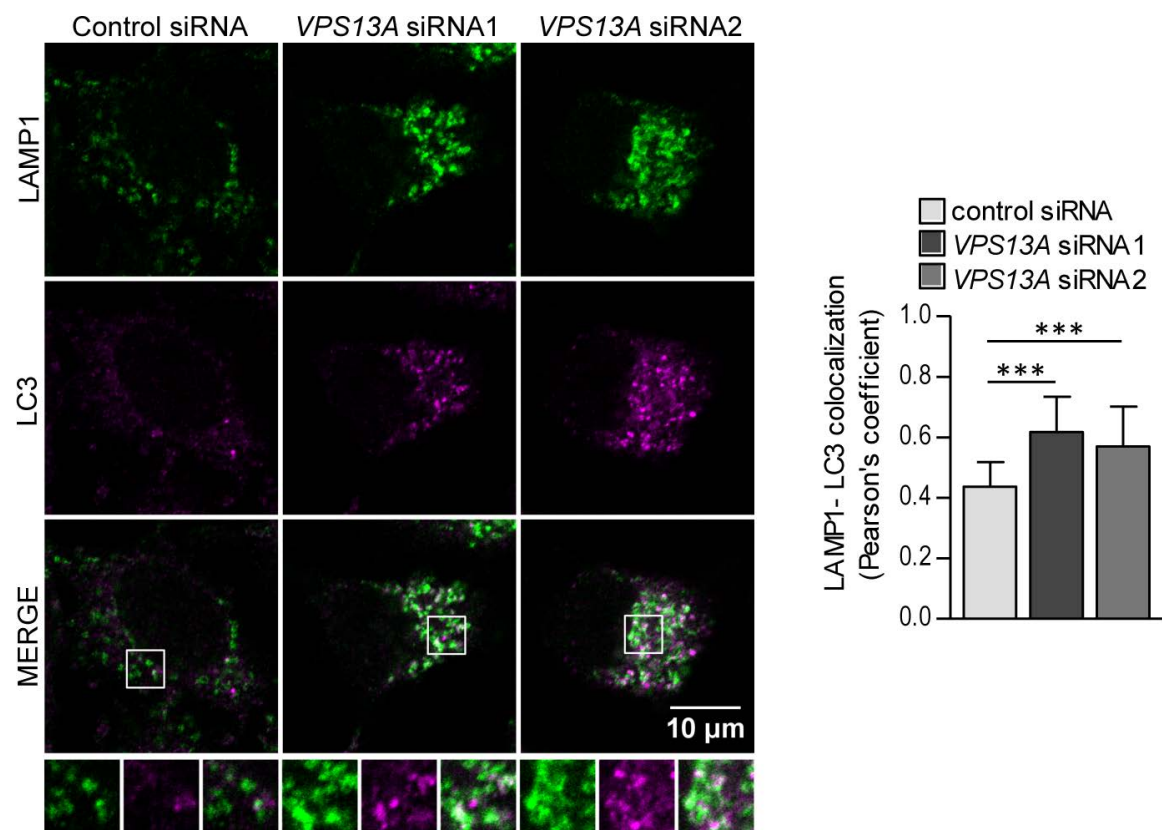

**Fig. S1. LAMP1 and LC3 accumulate and colocalize in VPS13A depleted cells.** HeLa cells were treated with control or *VPS13A* siRNAs and LAMP1 and LC3 were visualized by immunofluorescence. Representative images, enlargements of selected areas, and the quantification of the LAMP1-LC3 colocalization in 20 cells per condition and experiment are shown. Means  $\pm$  s.d. of three independent experiments are represented.

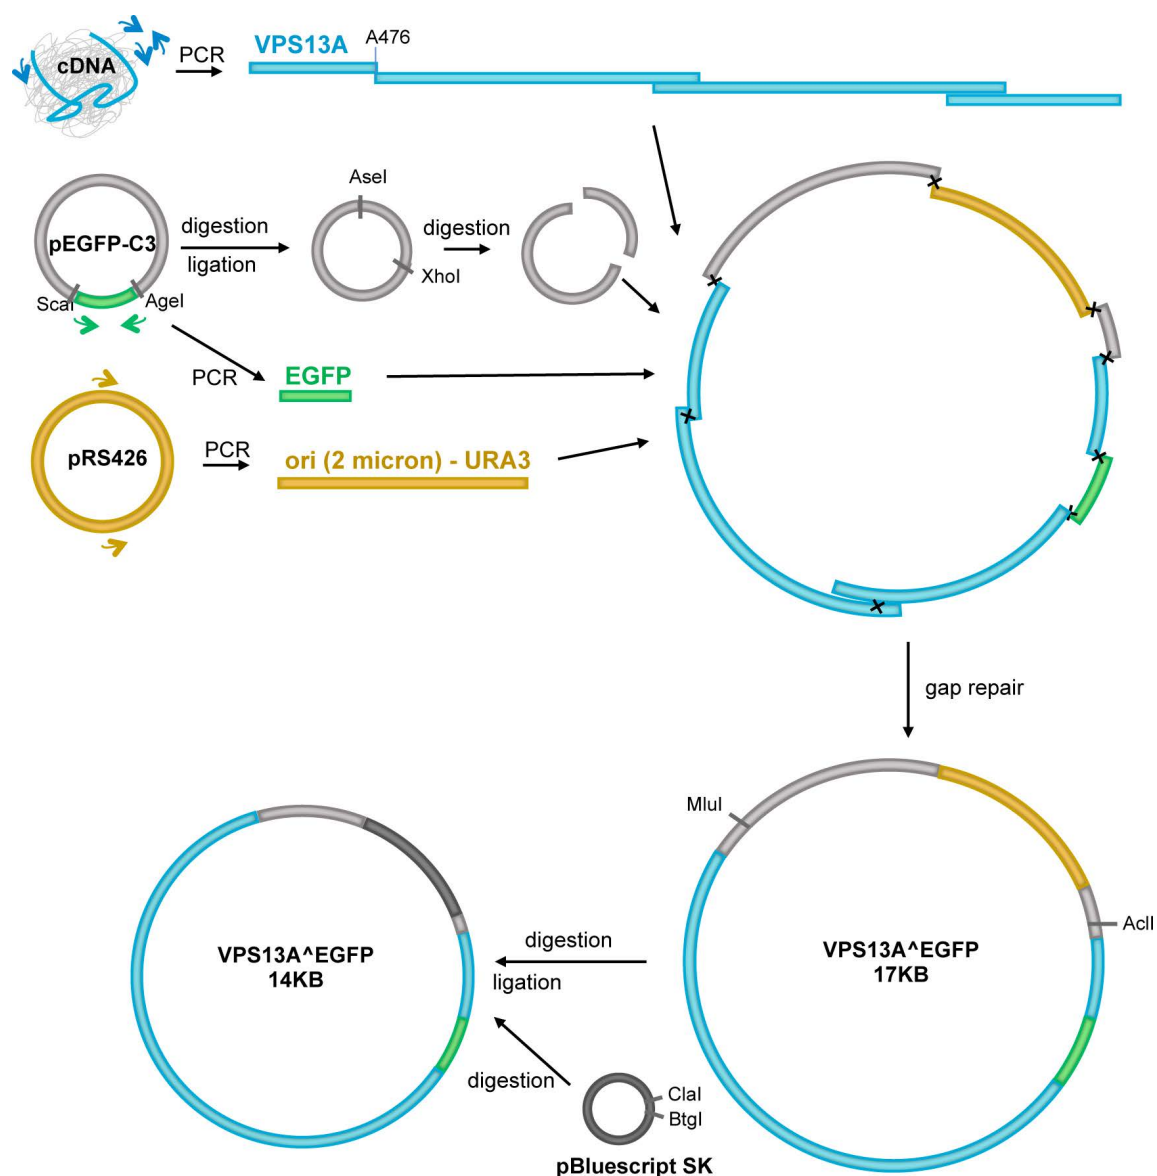

**Fig. S2. Scheme of the strategy to construct the VPS13A<sup>EGFP</sup> expression plasmid.**

PCR fragments corresponding to VPS13A cDNA, EGFP, all the elements necessary for plasmid selection and amplification in yeast cells, and two fragments of a digested mammalian expression vector were introduced in *S. cerevisiae* cells, where they were all assembled by homologous recombination. The plasmid generated by this gap repair approach was isolated from yeast cells and amplified in *E. coli* cells transformed with the plasmid. To reduce the size of the construction, a second expression VPS13A<sup>EGFP</sup> plasmid was obtained by conventional cloning.

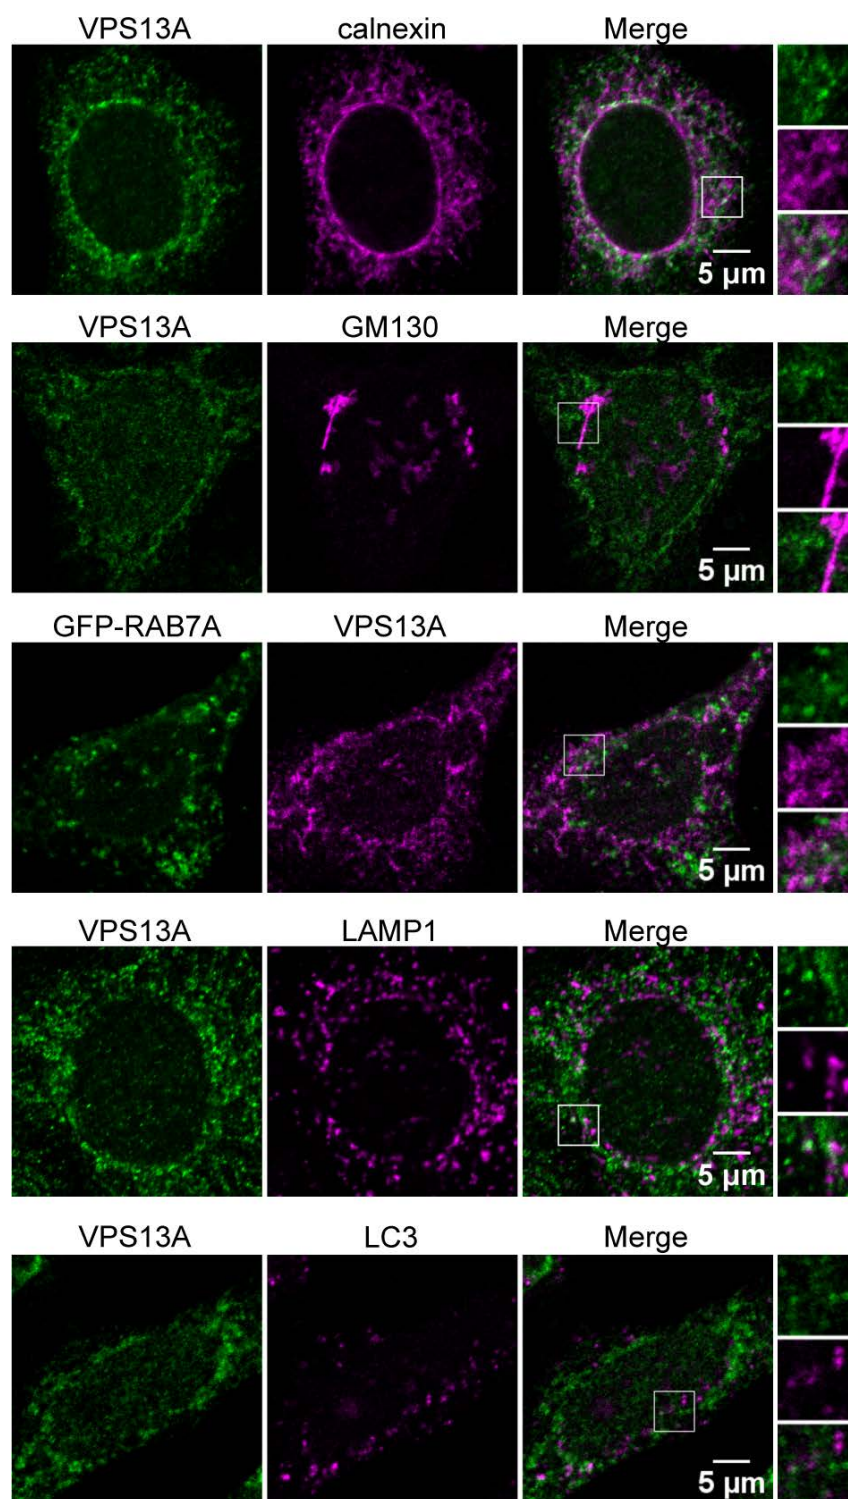

**Fig. S3. Endogenous VPS13A colocalization with various organelle markers.** Endogenous VPS13A was labeled by immunofluorescence and visualized in HeLa cells labeled with antibodies against calnexin, GM130, LAMP1 or LC3 (markers of the ER, *cis*-Golgi, lysosomes, or autophagosomes, respectively) or transiently transfected with mCherry-RAB7A to visualize endosomes. Enlargements of selected areas are shown to better visualize the colocalization between VPS13A and the organelle markers.

**Table S1. Proteins identified as strong candidates for the interaction with *D. discoideum* TipC<sup>2725-3848</sup>-GFP.**

| UniProt ID | Protein name                                          | Unique peptides | Coverage |
|------------|-------------------------------------------------------|-----------------|----------|
| Q54GX7     | Actin-10                                              | 12              | 46.0     |
| P07828     | Actin-18                                              | 1               | 15.0     |
| P0CT31     | Elongation factor 1-alpha                             | 10              | 28.0     |
| P15064     | Ras-like protein rasG                                 | 4               | 30.2     |
| P32252     | Ras-like protein rasB                                 | 2               | 11.2     |
| P34139     | Ras-related protein Rab-1A                            | 4               | 34.7     |
| Q54NU2     | Ras-related protein Rab-1D                            | 2               | 22.5     |
| P36411     | Ras-related protein Rab-7A                            | 3               | 15.3     |
| P34144     | Rho-related protein rac1A                             | 4               | 21.1     |
| Q54J48     | Probable pyridoxal 5'-phosphate synthase subunit pdx2 | 3               | 21.8     |
| Q8MPA5     | Small heat shock protein hspG7                        | 1               | 19.8     |
| P14794     | Ubiquitin-60S ribosomal protein L40                   | 4               | 41.4     |

**Table S2. Oligonucleotide primers used during the construction of the HA-Rab7A expression plasmid for *D. discoideum*.**

|           |                                                                    |
|-----------|--------------------------------------------------------------------|
| ddRAB7-Fw | 5'-GCAAGATCTAAAATGTATCCATATGATGTTCCAGATTATGCAGCCACAAAGAAAAAGGTT-3' |
| ddRAB7-Rv | 5'-CGTACTAGTTTAAACAACAACCTGATTTAGC-3'                              |

**Table S3. Oligonucleotide primers used during the construction of the VPS13A<sup>Δ</sup>EGFP expression plasmid for mammalian cells.**

|              |                                                                     |
|--------------|---------------------------------------------------------------------|
| Y-Fw         | 5'-TTCTGTGGATAACCGTATTACCGCCATGCATTAGTTATGGTTCCGCGCACATTTCCCGG-3'   |
| Y-Rv         | 5'-TATGAACTAATGACCCCGTAATTGATTACTATTAGTGAGTTTAGTATACATGCATTTAC-3'   |
| EGFP-Fw      | 5'-GCAGGTGGTGGCGGTTTCAGGCGGAGGTGGCTCTGTGAGCAAGGGCGAGGAGCTGTTACC-3'  |
| EGFP-Rv      | 5'-GGATCAACCGATCCGCCACCGCCGAGCCACCGCCACCCTTGTACAGCTCGTCCATGCCG-3'   |
| VPS 13A-1-Fw | 5'-TCAGATCCGCTAGCGCTACCGGACTCAGATCGCCACCATGGTTTTTCGAGTCGGTGGTTCG-3' |
| VPS13A-1-Rv  | 5'-AGAGCCACCTCCGCCTGAACCGCCACCACCTGCTGTTTCACTATAGCCAATTGC-3'        |
| VPS13A-2-Fw  | 5'-GGTGGCGGTGGCTCGGGCGGTGGCGGATCGGTTGATCCAACCTTTACTAAAAACATTTG-3'   |

|             |                                                                   |
|-------------|-------------------------------------------------------------------|
| VPS13A-2-Rv | 5'-CCACAACCTCAAGATTTAATGGCAGG-3'                                  |
| VPS13A-3-Fw | 5'-GGATCTACTCCTGCCATTAAATCTTGAGG-3'                               |
| VPS13A-3-Rv | 5'-CAGACTGTAGATCGGATGTTGTATGG-3'                                  |
| VPS13A-4-Fw | 5'-GTGAAATAGAAGATTCCTCCCTCC-3'                                    |
| VPS13A-4-Rv | 5'-CGTCGACTGCAGAATTCGAAGCTTGAGCTCGATCAGAGGCTCGGAGAAGGTTCTCTTGC-3' |
